# Supplementary material for: Deguelin inhibits non-small cell lung cancer via down-regulating Hexokinases II-mediated glycolysis
Source: PubMed Central journal article supplement (PMC5464811; doi:10.18632/oncotarget.15937), 2017-03-06
Supplement: oncotarget-08-32586-s001.pdf [file oncotarget-08-32586-s001.pdf]

## Deguelin inhibits non-small cell lung cancer via down-regulating Hexokinases II-mediated glycolysis

### Supplementary Materials

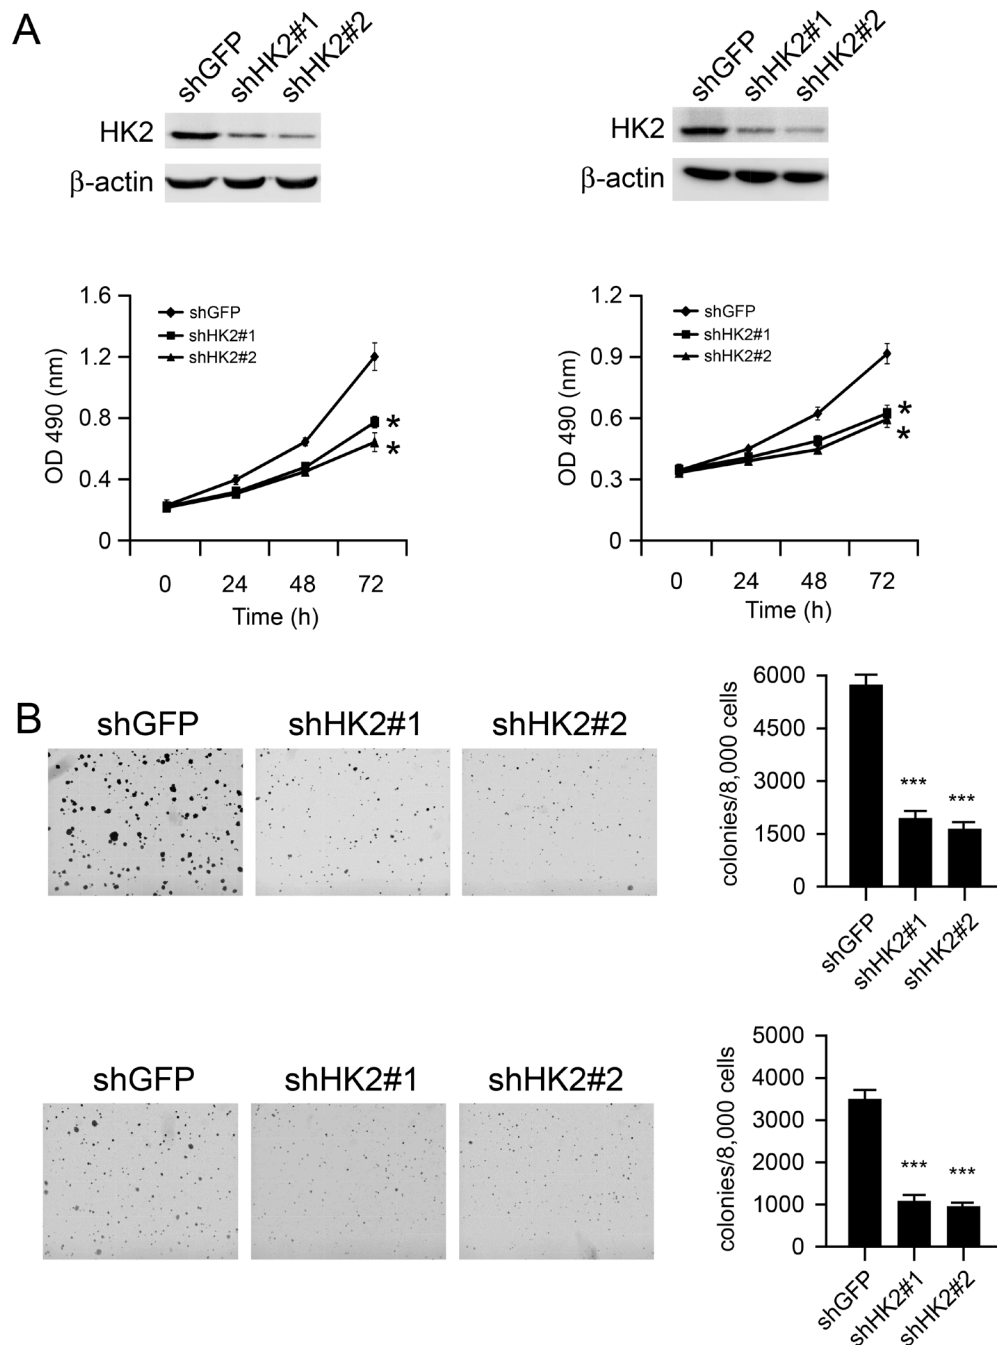

**Supplementary Figure 1: Knockdown of HK2 inhibits tumor cell growth.** (A) western blot verifies knockdown of HK2 in H460 (left) and H1650 (right) cells. (B) the growth curves show the difference in anchorage-dependent growth between GFP and HK2 knockdown cells, left, H460, right, H1650 ( $*p < 0.05$ ). (C) soft agar assay show the difference in anchorage-independent growth between GFP and HK2 knockdown cells, top, H460, bottom, H1650. Representative photographs are shown, and the graph (right) shows data from at least 3 independent experiments expressed as means  $\pm$  S.D. The asterisk ( $***p < 0.001$ ) indicates a significant decrease in colony formation by knockdown cells.

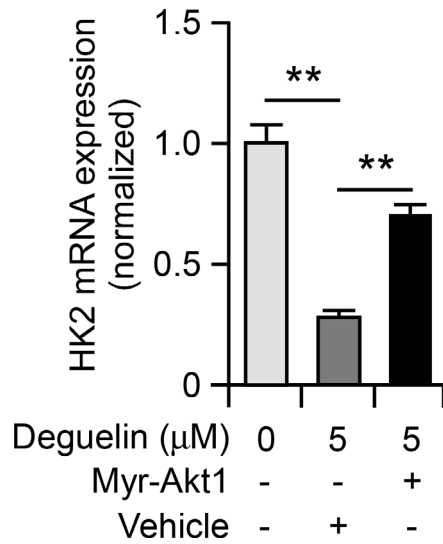

**Supplementary Figure 2: Real-time RT-PCR analysis of total HK2 mRNA levels in H460 cells.** H460 cells were treated with deguelin as indicated, the mRNA was extracted for Real-time PCR analysis. The data are expressed as means ± SD (\*\* $p < 0.01$ ).

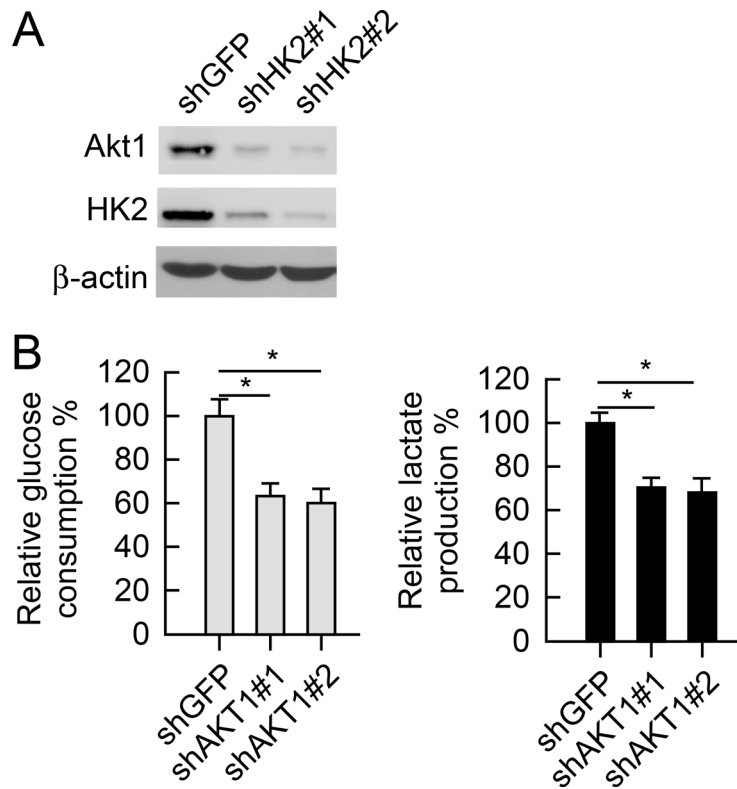

**Supplementary Figure 3: Knockdown of Akt1 inhibits glycolysis.** (A) western blot verifies knockdown of Akt1 in H460 cells. (B) the levels of glucose consumption (left) and lactate production (right) were examined in these cells. The asterisk indicates significant suppression ( $*p < 0.05$ ) of glycolysis in Akt knockdown cells.

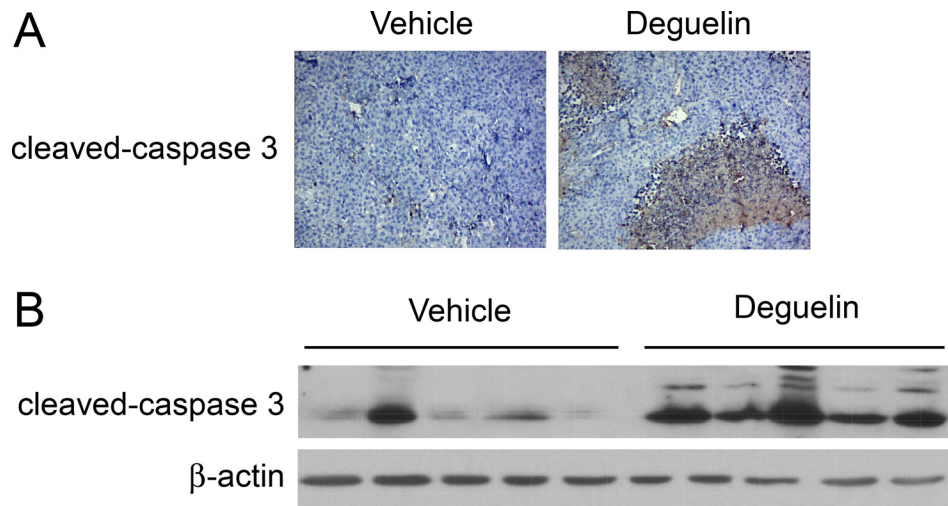

**Supplementary Figure 4:** (A) immunohistochemical staining examination of cleaved-caspase3 in tumor sections from vehicle group mice or deguelin-treated group mice. (B) western blot examination of cleaved-caspase3 in tumor sections from vehicle group mice or deguelin-treated group mice.
